# Supplementary material
Source: MDPI journal article supplement (https://www.mdpi.com/2227-9717/10/10/1924)
Supplement: s1 [file s1]

Supplementary material: Mielke et al., 2022, “Pyrolysis temperature and application rate of sugarcane straw biochar influence sorption and desorption of metribuzin and soil chemical properties”

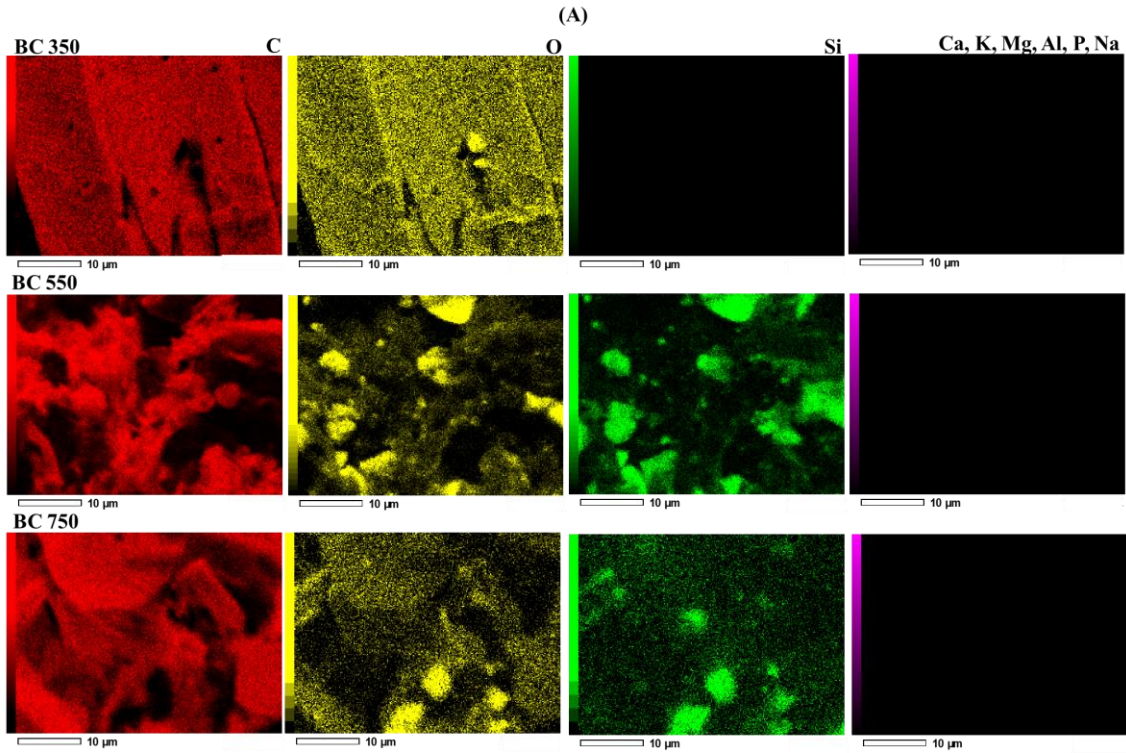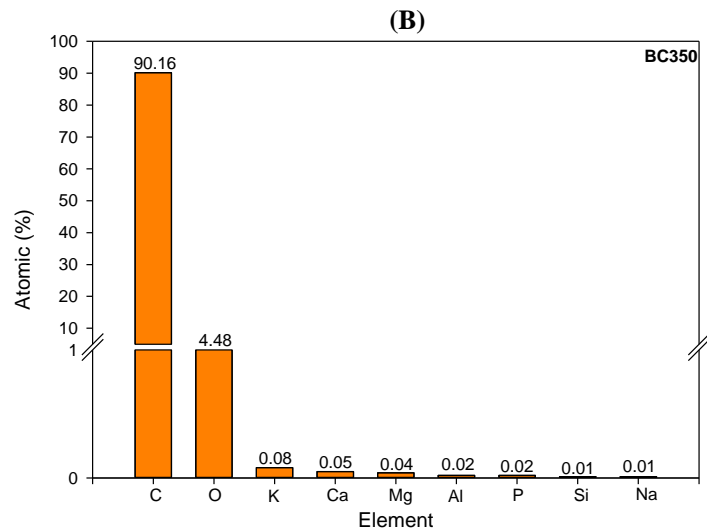

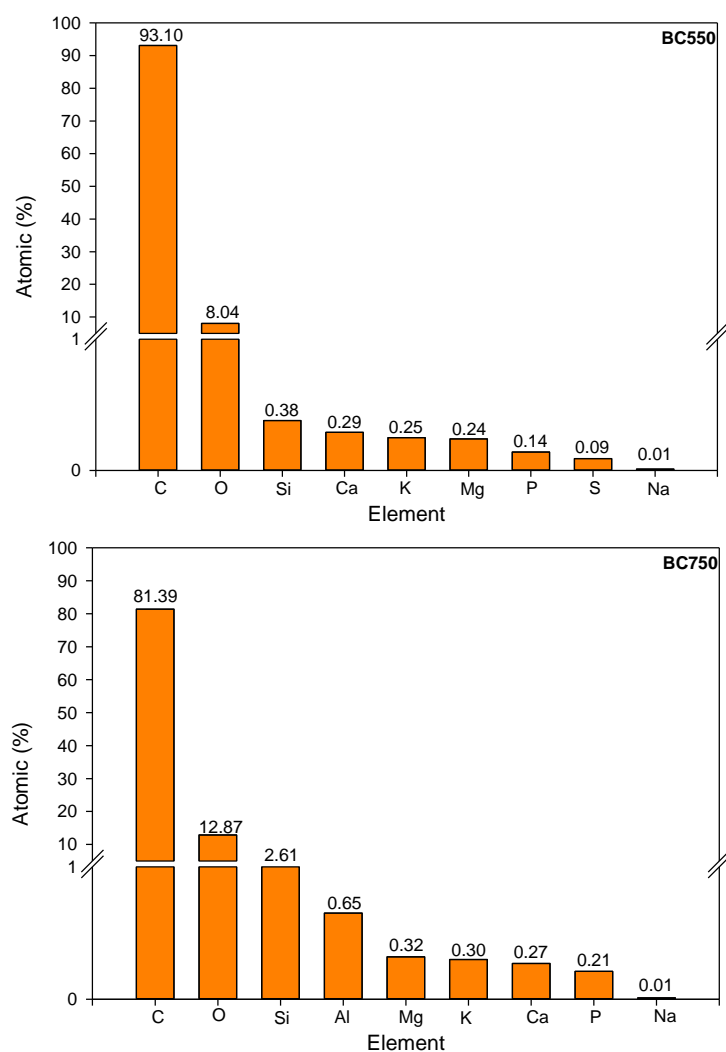

**Figure. S1.** Surficial elemental composition C (red), O (yellow), Si (green), Ca, K, P, Al, P, and Na (undetected) by energy dispersive X-ray spectrometry (EDS) analysis of biochar (BC) (**A**) and EDS spectrogram (**B**) in different pyrolysis temperatures (350, 550, and 750°C).

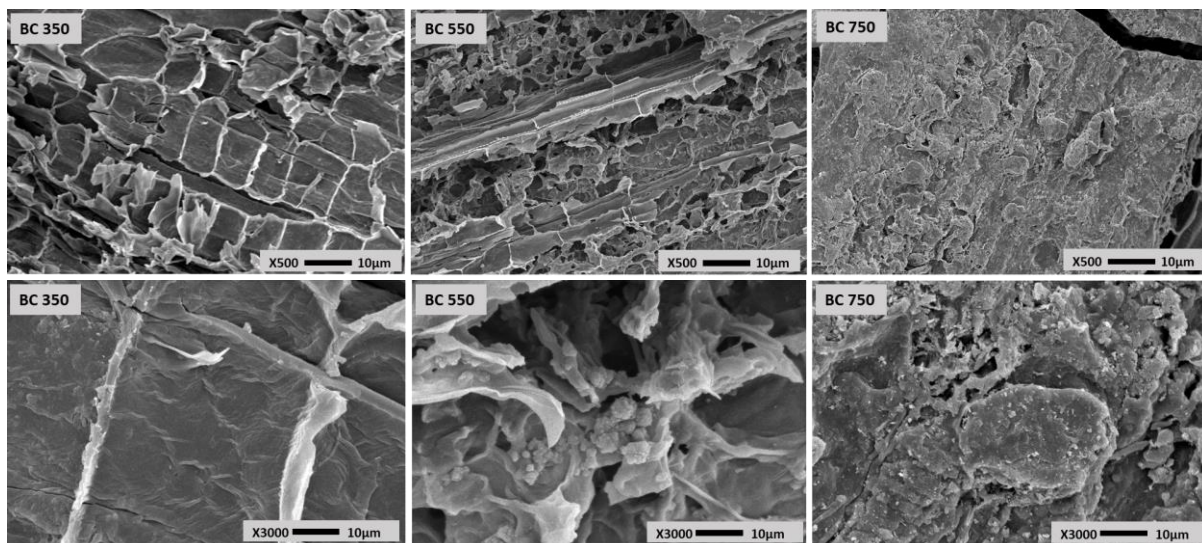

**Figure. S2.** Images of the biochar (BC) derived from sugar cane straw at different pyrolysis temperatures (350, 550, and 750°C) by Scanning Electron Microscopy (SEM) at 500- and 3000-times magnification.
